# Supplementary material for: Exploring the Adsorption of Pb on Microalgae-Derived Biochar: A Versatile Material for Environmental Remediation and Electroanalytical Applications
Source: MDPI journal article supplement (doi:10.3390/chemosensors10050168), 2022-04-30
Supplement: s1 [file s1]

# **Exploring the adsorption of Pb on microalgae-derived biochar: a versatile material for environmental remediation and electroanalytical applications**

**Gilberto Binda<sup>1,2</sup>, Davide Faccini<sup>2</sup>, Martina Zava<sup>2</sup>, Andrea Pozzi<sup>2</sup>, Carlo Dossi<sup>3</sup>, Damiano Monticelli<sup>2,\*</sup>, Davide Spanu<sup>2,\*</sup>**

<sup>1</sup> Norwegian Institute for Water Research (NIVA), Økernveien 94, 0579 Oslo, Norway; gilberto.binda@niva.no

<sup>2</sup> Department of Science and High Technology, University of Insubria, via Valleggio 11, 22100 Como, Italy; dfaccini@studenti.uninsubria.it (D.F.); mzava@studenti.uninsubria.it (M.Z.); andrea.pozzi@uninsubria.it (A.P.)

<sup>3</sup> Department of Theoretical and Applied Science, University of Insubria, via J.H. Dunant 3, 21100 Varese, Italy; carlo.dossi@uninsubria.it

\* Correspondence: davide.spanu@uninsubria.it (D.S.); damiano.monticelli@uninsubria.it (D.M.)

Tel.: +39-0312386428 (D.S.); +39-0312386427 (D.M.)

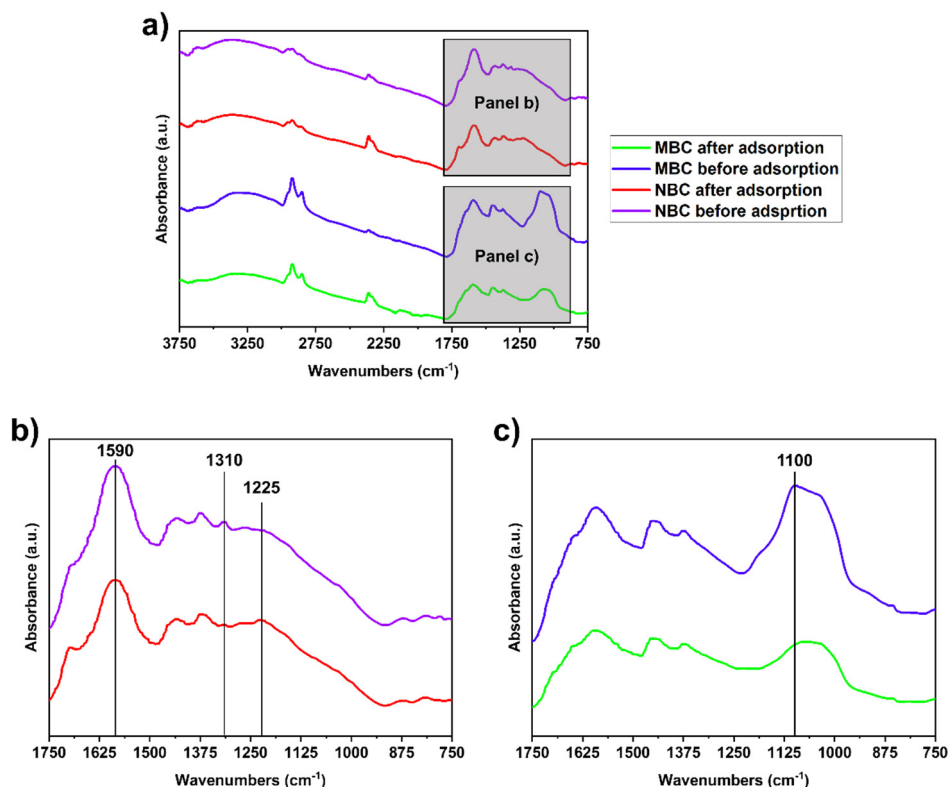

**Figure S1.** IR spectra of NBC and MBC before and after 24h of Pb adsorption in ultrapure water solution, with initial Pb concentration of 25  $\mu\text{mol/L}$ . Panel a) show the whole IR spectra, while panels b) and c) show the detailed 1750-750  $\text{cm}^{-1}$  window of NBC samples and MBC samples, respectively. IR bands of peaks showing changes before and after adsorption are highlighted as well.

**Table S1.** Physicochemical features and major ion concentration of lake water used for Pb adsorption experiments.

| Variable                      | Unit             | Value      |
|-------------------------------|------------------|------------|
| Sampling date                 | -                | 18/02/2021 |
| pH                            | -                | 8.2        |
| Electrical conductivity       | $\mu\text{S/cm}$ | 210        |
| Alkalinity                    | $\text{mmol/l}$  | 1.5        |
| Chemical Oxygen Demand        | $\text{mg/L}$    | 18         |
| Na <sup>+</sup>               | $\text{mg/L}$    | 2.84       |
| NH <sub>4</sub> <sup>+</sup>  | $\text{mg/L}$    | 0.95       |
| K <sup>+</sup>                | $\text{mg/L}$    | 1.59       |
| Mg <sup>2+</sup>              | $\text{mg/L}$    | 3.88       |
| Ca <sup>2+</sup>              | $\text{mg/L}$    | 16.75      |
| F <sup>-</sup>                | $\text{mg/L}$    | 1.30       |
| Cl <sup>-</sup>               | $\text{mg/L}$    | 3.73       |
| NO <sub>3</sub> <sup>-</sup>  | $\text{mg/L}$    | 3.55       |
| SO <sub>4</sub> <sup>2-</sup> | $\text{mg/L}$    | 15.7       |

**Table S2.** Estimated parameters of pseudo-first order and pseudo-second order kinetics, as well as of Langmuir and Freundlich isotherms.

| Fitting                             | Parameter | MBC               | NBC              |
|-------------------------------------|-----------|-------------------|------------------|
| <b>Pseudo-first order kinetics</b>  | $Q_e$     | $1.96 \pm 0.05$   | $1.97 \pm 0.03$  |
|                                     | $K_1$     | $0.028 \pm 0.003$ | $0.02 \pm 0.001$ |
|                                     | $R^2$     | 0.855             | 0.907            |
| <b>Pseudo-second order kinetics</b> | $Q_e$     | $2.03 \pm 0.08$   | $2.01 \pm 0.03$  |
|                                     | $K_2$     | $0.03 \pm 0.01$   | $0.014 \pm 0.06$ |
|                                     | $R^2$     | 0.950             | 0.972            |
| <b>Langmuir isotherm</b>            | $Q_m$     | $33.92 \pm 4.32$  | $11.08 \pm 0.59$ |
|                                     | $K_L$     | $0.2 \pm 0.05$    | $0.08 \pm 0.01$  |
|                                     | $R^2$     | 0.992             | 0.996            |
| <b>Freundlich isotherm</b>          | $n$       | $0.56 \pm 0.002$  | $0.48 \pm 0.03$  |
|                                     | $K_F$     | $6.57 \pm 0.03$   | $1.6 \pm 0.01$   |
|                                     | $R^2$     | 0.988             | 0.979            |

**Table S3.** Estimated regression coefficients and p-values of the predicted second order polynomial model (including parameters interaction,  $R^2 = 0.916$ ) for Pb removal efficiencies obtained using NBC.

| Variable                             | Regression Coefficient | p-value |
|--------------------------------------|------------------------|---------|
| (Intercept)                          | 97.19                  | < 0.001 |
| $\text{NaNO}_3$                      | -1.17                  | 0.087   |
| pH                                   | 0.99                   | 0.12    |
| $\text{NaNO}_3 \times \text{NaNO}_3$ | 0.52                   | 0.57    |
| $\text{pH} \times \text{pH}$         | -3.47                  | 0.023   |
| $\text{NaNO}_3 \times \text{pH}$     | 0.99                   | 0.18    |

**Table S4.** Estimated regression coefficients and p-values of the predicted second order polynomial model (including parameters interaction,  $R^2 = 0.983$ ) for Pb removal efficiencies obtained using MBC.

| Variable                             | Regression Coefficient | p-value |
|--------------------------------------|------------------------|---------|
| (Intercept)                          | 98.36                  | <0.001  |
| $\text{NaNO}_3$                      | -0.47                  | 0.10    |
| pH                                   | 2.16                   | 0.0017  |
| $\text{NaNO}_3 \times \text{NaNO}_3$ | 0.087                  | 0.82    |
| $\text{pH} \times \text{pH}$         | -2.36                  | 0.0065  |
| $\text{NaNO}_3 \times \text{pH}$     | 0.74                   | 0.056   |
